# Supplementary material for: Fully automated, sequential focused ion beam milling for cryo-electron tomography
Source: eLife. 2020 Mar 9;9:e52286. doi: 10.7554/eLife.52286 (PMC7082125; doi:10.7554/eLife.52286)
Supplement: Figure 2—figure supplement 2—source data 1. [file elife-52286-fig2-figsupp2-data1.xlsx]

## Sheet: Sheet1
	Session ID
	Lamellae #	A	B.1	B.2	C	D	E	F	G	H	I		Lamella Thickness Range		Number
	1	N.A.*	291	225	222	230	245	222	298	117	309		100-149		2
	2	252	274	217	N.A.*	278	216	257	308	128	263		150-199		7
	3	273	230	174	255	219	282	252	273	219	220		200-249		29
	4	272	344	267	225	206	256	291	294	154	286		250-299		29
	5	236	N.A.*	228	379	256	220	208	Crack	N.A.*	N.A.*		300-349		9
	6	254			162	257	281	190	Contam.	332	N.A.*		350-400		1
	7	205			216	221	Broken	221	Contam.	203	251
	8	216			189			261	Broken	299	266
	9	243			200			228	Broken	251	N.A.*
	10	N.A.*			190			204	Broken	N.A.*	305
	11				155			243		202	N.A.*
	12							Crack/Cont.		314	310
	13							Broken		288	301
	14							Broken		269	307
	15							Broken		Crack	Crack
	16							Broken		Broken	Broken
	17									Broken	Broken
	18									Broken	Broken
	19										Broken
	20
	Lost in Tran.	0	0	0	0	0	1	4	3	3	4
	* Indicates that data collection failed
	Manual milling lamellae thickenss			257.5
	Automated milling lamellae thickness			243.308
	Total Lamellae Lost in Transfer			15
	Average Lamellae Loss in Transfer			0.16129
