# Supplementary material for: Fully automated, sequential focused ion beam milling for cryo-electron tomography
Source: eLife. 2020 Mar 9;9:e52286. doi: 10.7554/eLife.52286 (PMC7082125; doi:10.7554/eLife.52286)
Supplement: Figure 3—figure supplement 1—source data 1. [file elife-52286-fig3-figsupp1-data1.xlsx]

## Sheet: Sheet1
	Fourier Shell Correction	Automated FIB Milling	Manual FIB Milling
	0.01762	0.9973	0.9997
	0.05285	0.9974	0.9989
	0.08809	0.9977	0.9979
	0.1233	0.9979	0.997
	0.1586	0.996	0.9929
	0.1938	0.9865	0.9736
	0.229	0.9406	0.903
	0.2643	0.8287	0.886
	0.2995	0.7641	0.7765
	0.3347	0.5545	0.6346
	0.37	0.3248	0.4866
	0.4052	0.2618	0.2693
	0.4405	0.1618	0.1514
	0.4757	0.1236	0.04914
	0.5109	0.1185	0.02513
	0.5462	0.1499	0.01238
	0.5814	0.1152	0.03252
	0.6166	0.07728	0.04582
	0.6519	0.005174	0.01738
	0.6871	-0.02416	-0.001027
	0.7223	0.01022	-0.01541
